# Supplementary material for: Au–CeO2-based nanocatalysts supported on SBA-15 for preferential oxidation of carbon monoxide (PrOx-CO)
Source: Royal Society of Chemistry journal article supplement (doi:10.1039/d0nj04050a), 2020-01-01
Supplement: d0nj04050a1.pdf [file d0nj04050a1.pdf]

## Supporting Information

### **Au-CeO<sub>2</sub>-based nanocatalysts supported on SBA-15 for preferential oxidation of carbon monoxide (PrOx-CO)**

Gesiane P. Sousa<sup>1</sup>, Cristine S. Oliveira<sup>2</sup>, Érico Teixeira Neto<sup>1</sup>, Fernando A. Sigoli<sup>1</sup> and Italo O. Mazali<sup>1\*</sup>

<sup>1</sup> Laboratory of Functional Materials– Institute of Chemistry, University of Campinas - UNICAMP, P.O. Box 6154, 13083-970, Campinas - SP, Brazil.

<sup>2</sup>Institute of Physics, Martin Luther University Halle-Wittenberg, 06120 Halle (Saale), Germany

Corresponding Author:

\*mazali@unicamp.br

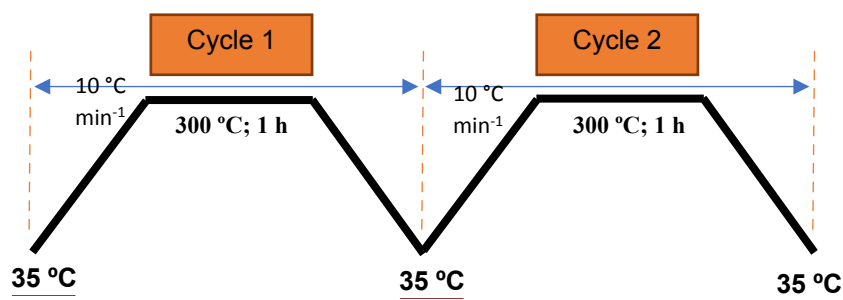

**Figure S1:** Catalytic test scheme.

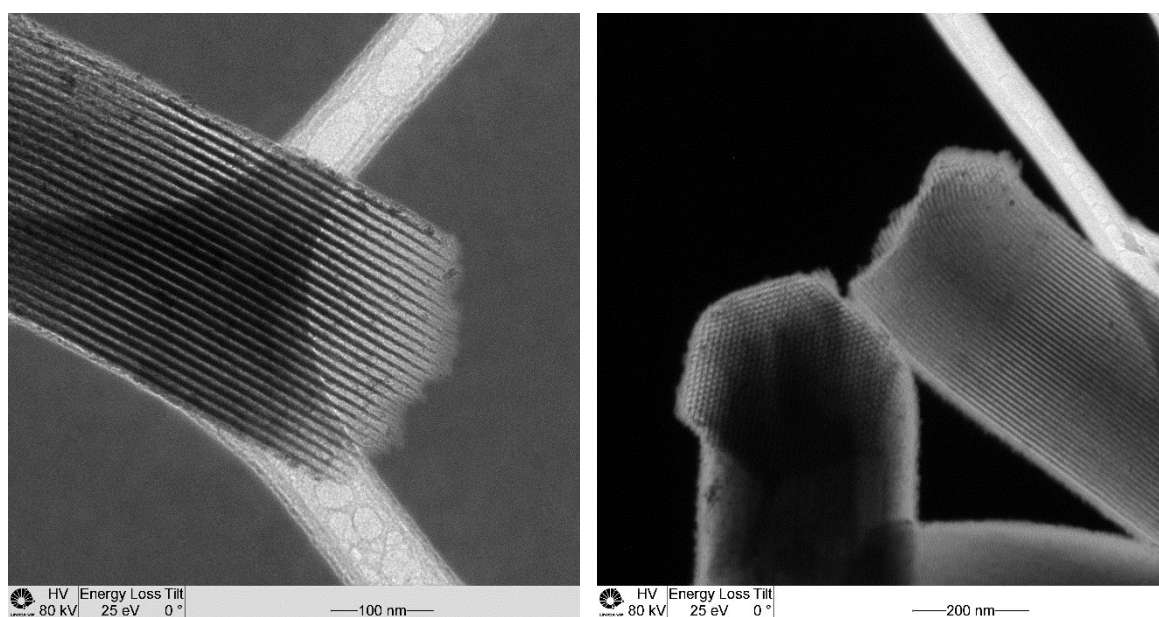

**Figure S2:** TEM images in Dark Field mode obtained for SBA-15, highlighting the highly ordered porous structure.

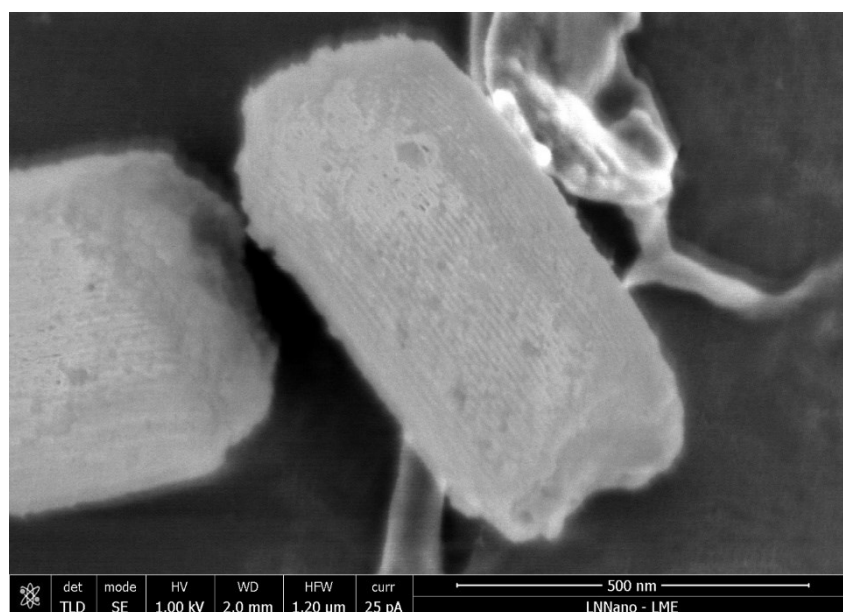

**Figure S3:** SEM image of the SBA-15, in which the hexagonal facets can be observed.

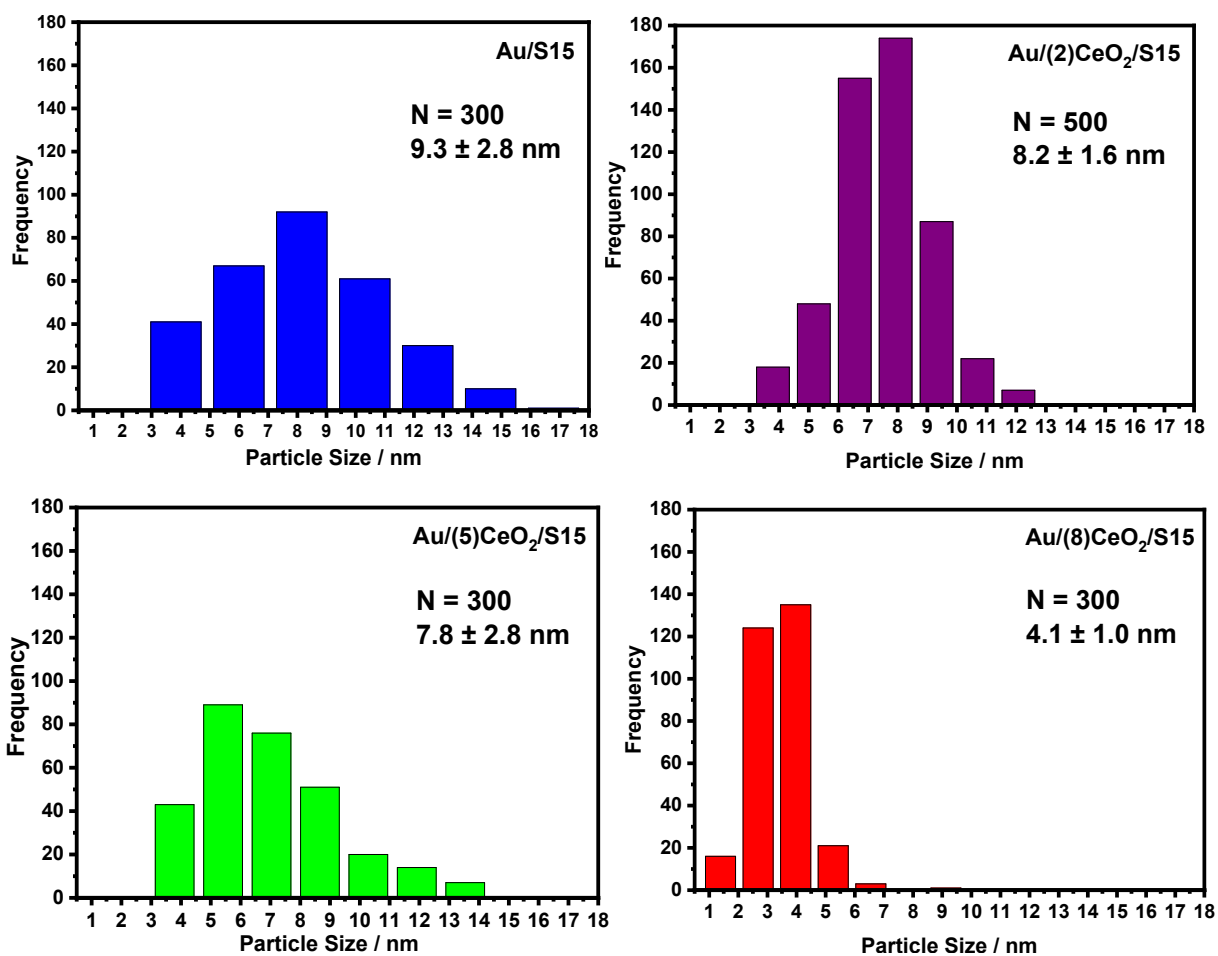

**Figure S4:** Particle size distributions obtained from the TEM images of the samples Au/S15 and Au/(x)CeO<sub>2</sub>/S15, where x = 2, 5 or 8.

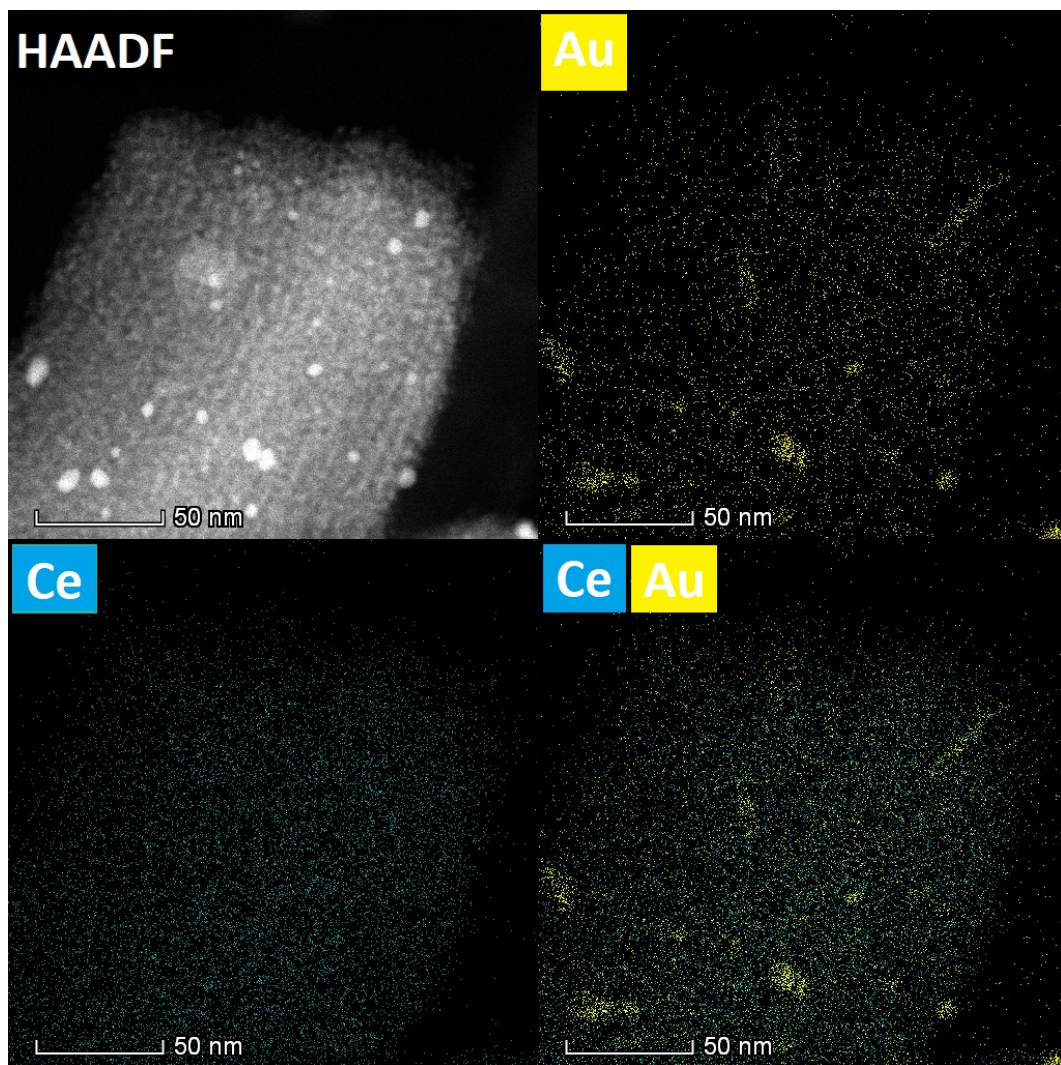

**Figure S5:** EDS mapping of the sample Au/(5)CeO<sub>2</sub>/S15 showing the Ce and Au distributions.

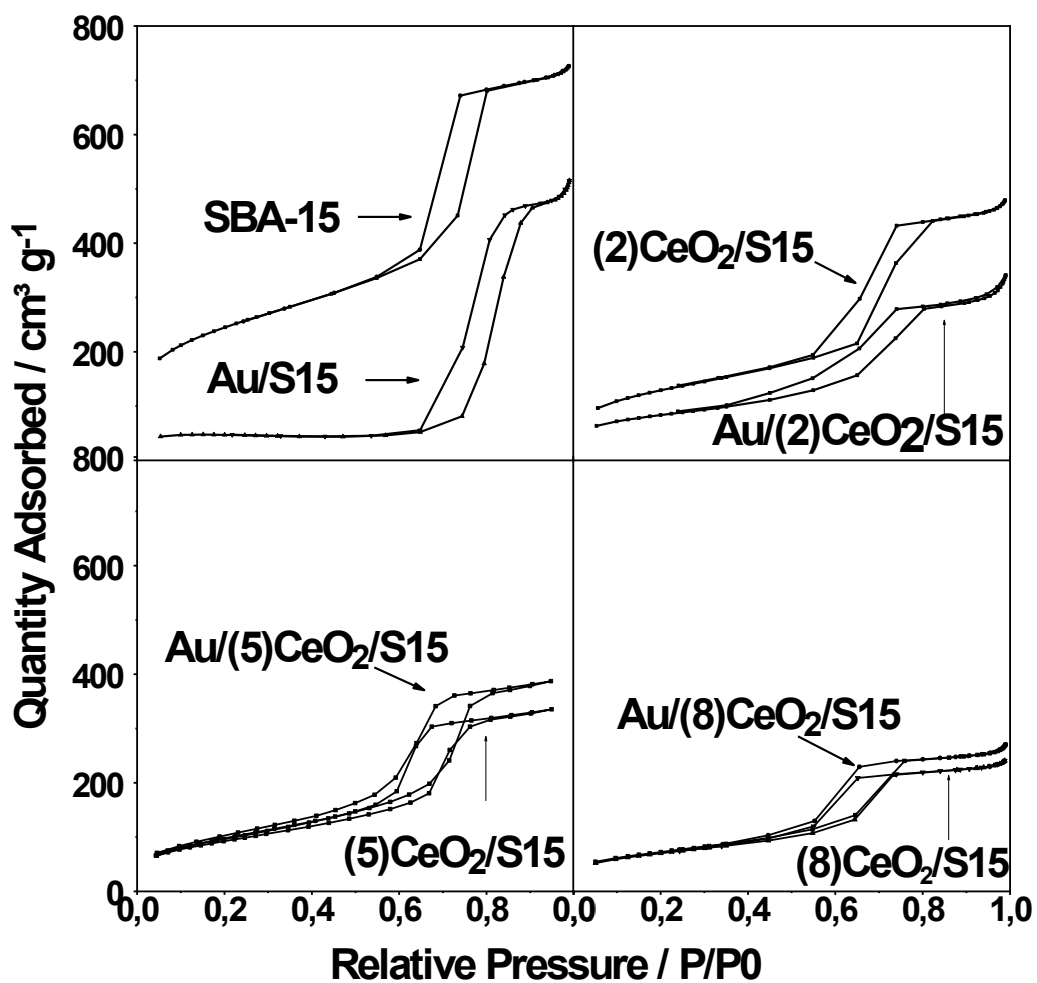

Figure S6: N<sub>2</sub> physisorption isotherms obtained for SBA/15, Au/S15 and Au/(x)CeO<sub>2</sub>/S15.

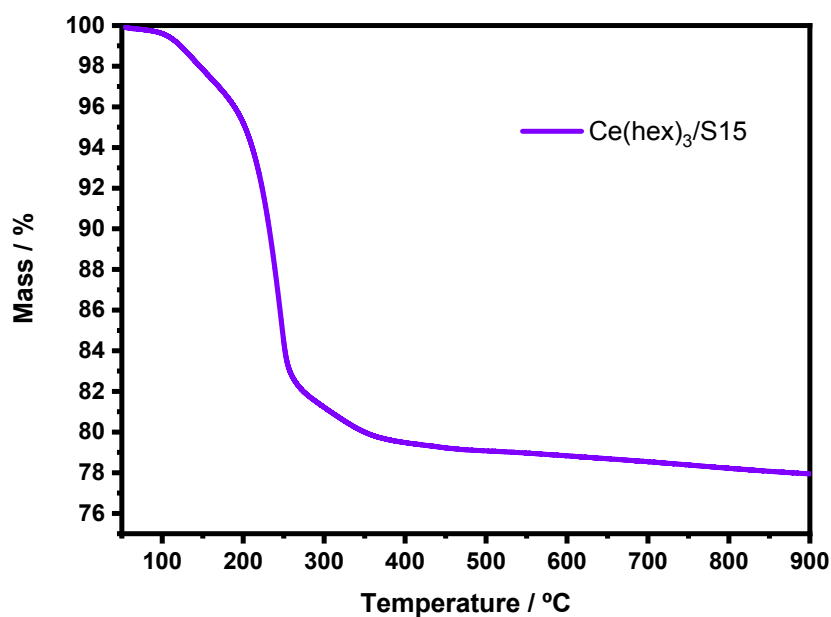

Figure S7: Thermogravimetric analysis of SBA-15 impregnated with Ce(III) 2-ethylhexanoate in hexane 0.75 mol L<sup>-1</sup>.

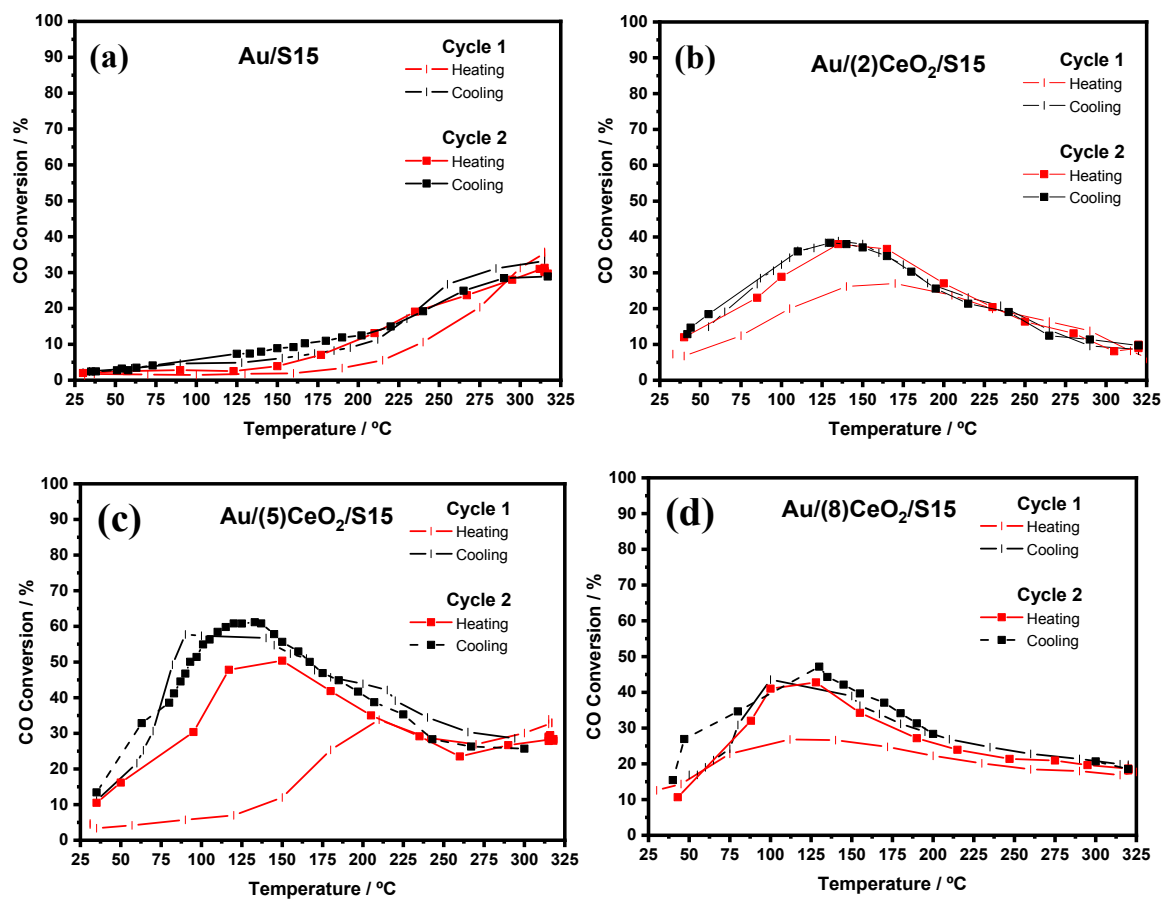

**Figure S8:** CO conversion (%) for the samples (a) Au/S15, (b) Au/(2)CeO<sub>2</sub>/S15, (c) Au/(5)CeO<sub>2</sub>/S15, (d) Au/(8)CeO<sub>2</sub>/S15.

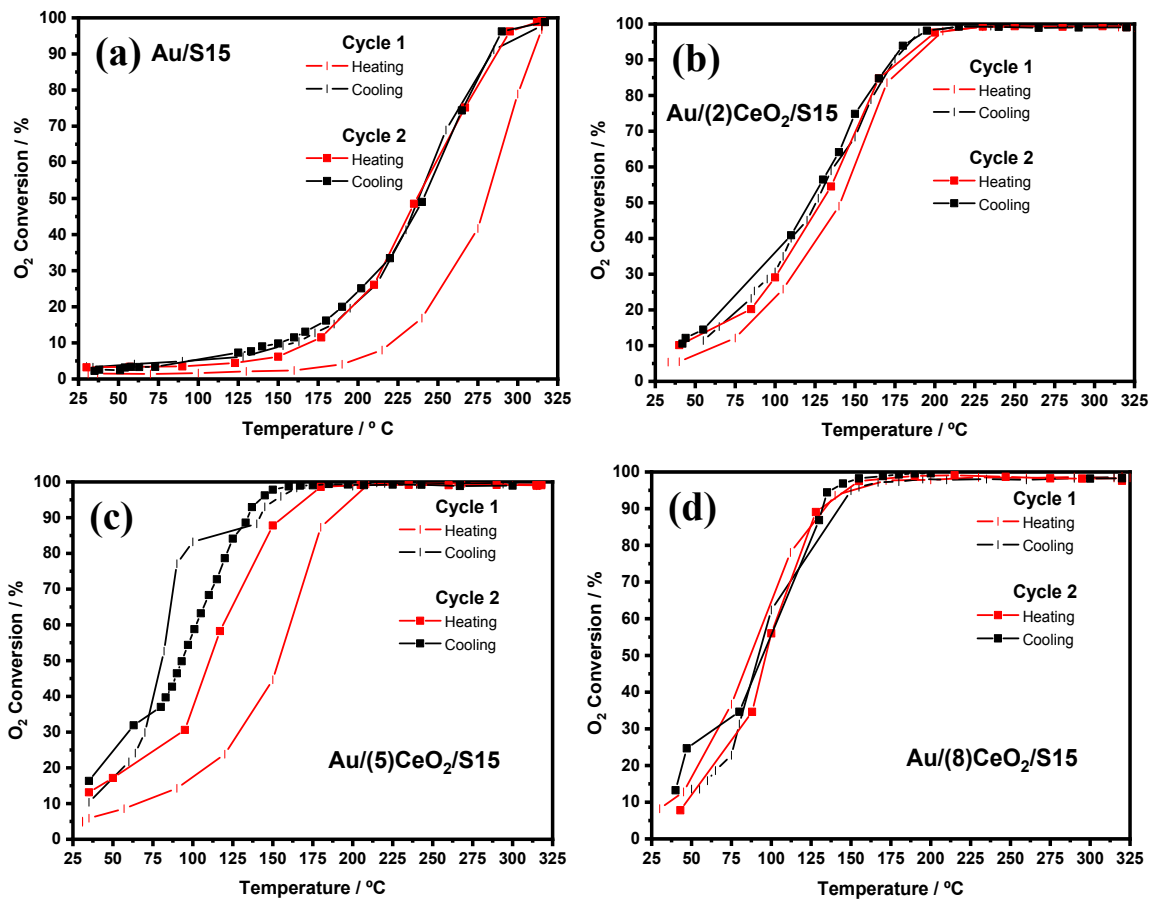

**Figure S9:** O<sub>2</sub> conversion (%) for the samples (a) Au/S15, (b) Au/(2)CeO<sub>2</sub>/S15, (c) Au/(5)CeO<sub>2</sub>/S15, (d) Au/(8)CeO<sub>2</sub>/S15.

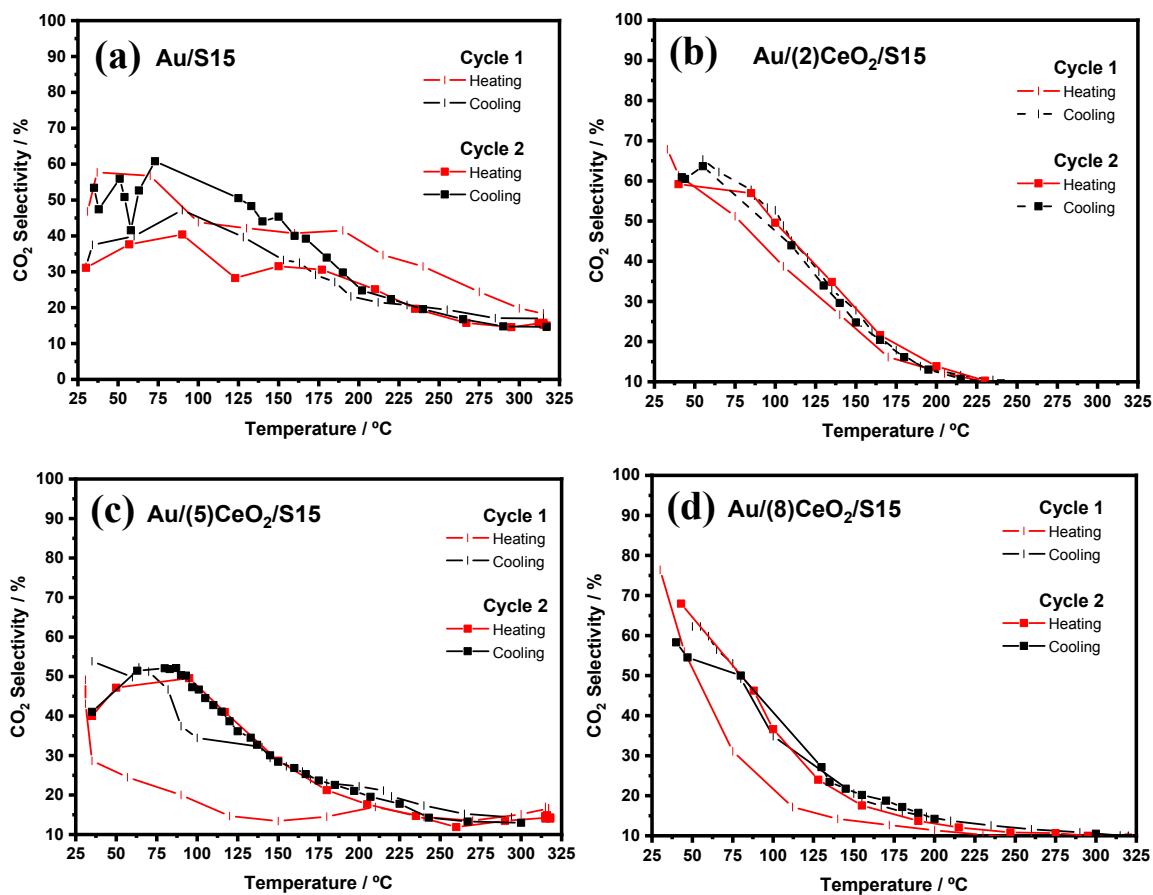

**Figure S10:** CO<sub>2</sub> selectivity (%) for the samples (a) Au/S15, (b) Au/(2)CeO<sub>2</sub>/S15, (c) Au/(5)CeO<sub>2</sub>/S15, (d) Au/(8)CeO<sub>2</sub>/S15.



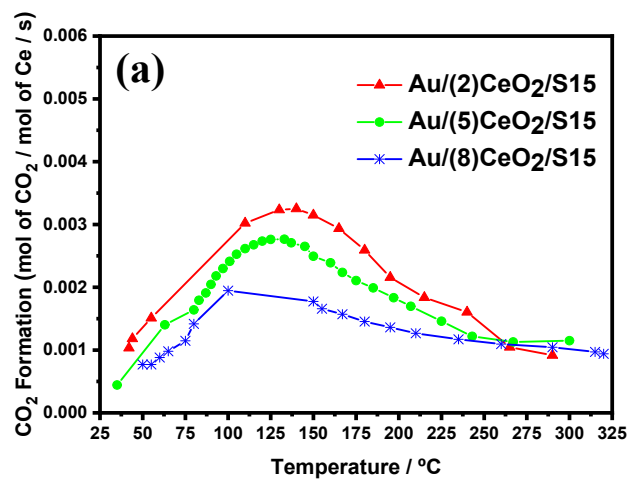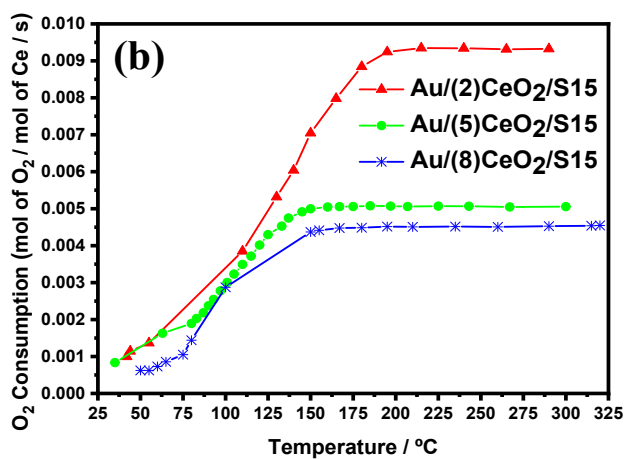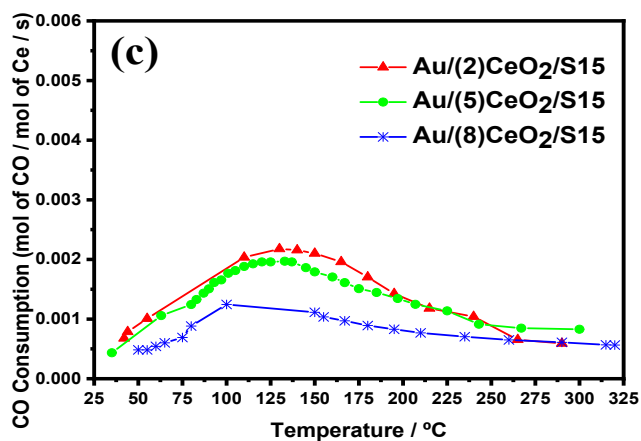

**Figure S11:** (a) CO consumption (mol of CO / mol of Ce / s), (b) CO<sub>2</sub> formation (mol of CO<sub>2</sub> / mol of Ce / s) and (c) O<sub>2</sub> consumption (mol of O<sub>2</sub> / mol of Ce / s) for Au/(x)CeO<sub>2</sub>/S15.

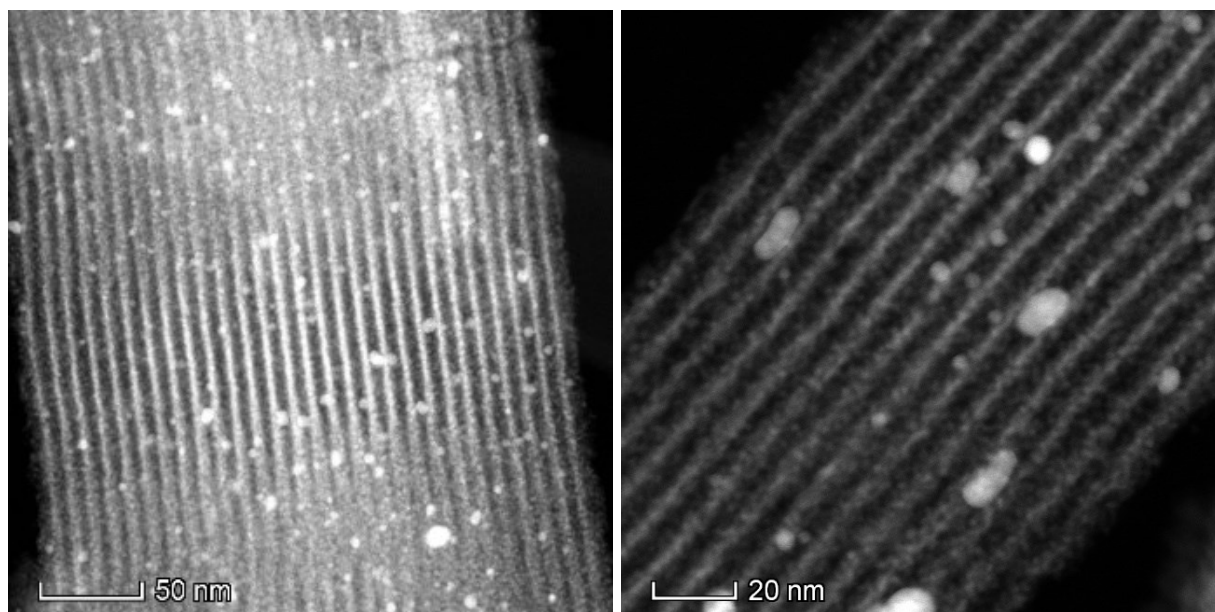

**Figure S12:** TEM image of the sample Au/(5)CeO<sub>2</sub>/S15, before (left) and after (right) PrOx-CO reaction.
